# Supplementary material
Source: Springer Nature journal article supplement (https://www.springermedizin.de/resource/supplementary/12872_2013_591_MOESM1_ESM.pdf/9430290)

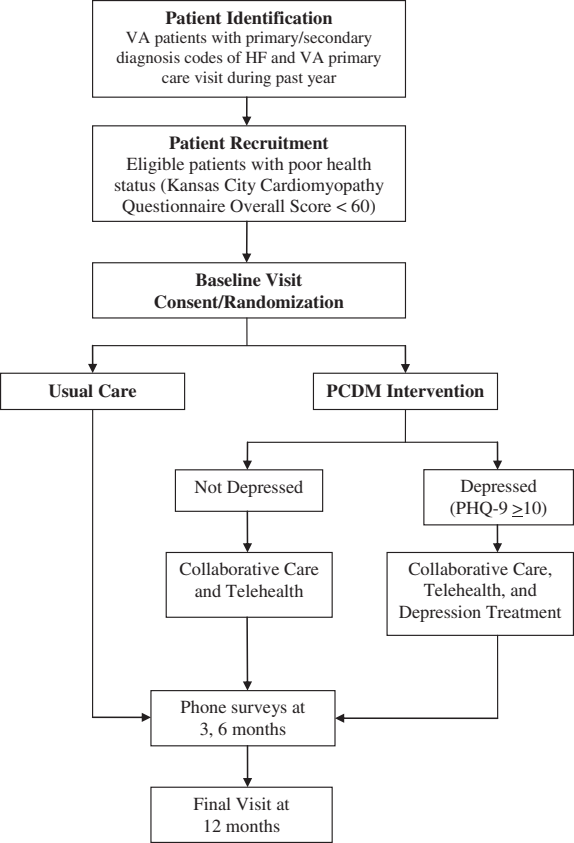

Supplement: MOESM1 [file 9430290]
